## 24    **Abstract**

25

26    We tested if high-level athletes or action video game players have superior context  
 27    learning skills. Incidental context learning was tested in a spatial contextual cueing  
 28    paradigm. We found comparable contextual cueing of visual search in repeated  
 29    displays in high-level amateur handball players, dedicated action video game  
 30    players and normal controls. In contrast, both handball players and action video  
 31    game players showed faster search than controls, measured as search time per  
 32    display item, independent of display repetition. Thus, our data do not indicate  
 33    superior context learning skills in athletes or action video game players. Rather,  
 34    both groups showed more efficient visual search in abstract displays that were not  
 35    related to sport-specific situations.

36

37

38    Keywords: visual search, attention, spatial memory, handball, team sports, action  
 39    video game playing

40

41 Team sport athletes have shown superior performance in visuospatial attentional  
 42 processing in a multitude of tasks (Mann, Williams, Ward, & Janelle, 2007).  
 43 However, investigation with athletes often focus on sport-specific situations  
 44 (Abernethy, 1991; Timmis, Turnmer, & van Paridon, 2014) making it difficult to  
 45 infer general underlying processes. A recent study, however, found improved skills  
 46 in athletes in a neutral, non-sport specific task with substantial visuospatial  
 47 demands (Faubert, 2013). In this study, professional team sport players and high-  
 48 level amateur players showed steeper learning curves in a repeatedly presented  
 49 multiple object tracking (MOT) task (Pylyshyn, & Storm, 1988) than non-athletic  
 50 controls. In this task, multiple dots out of a larger group are marked as targets at  
 51 the beginning of a trial. Then the marking disappears, and all dots start to move on  
 52 individually different random paths for several seconds. When the dot movement  
 53 stops, the target dots need to be indicated. Their superior performance led to the  
 54 claim that "professional athletes as a group have extraordinary skills for rapidly  
 55 learning unpredictable, complex dynamic visual scenes that are void of any  
 56 specific context" (Faubert, 2013, p. 3). However, the only learning that may  
 57 influence performance in the MOT task is a procedural learning of the dynamic  
 58 allocation of spatial attention (Alvarez, & Franconeri, 2007; Merkel, Hopf, &  
 59 Schoenfeld, 2017) because the dot movements in the MOT-task are randomly  
 60 generated, so there is no predictive information either within a trial or across  
 61 different trials ("dynamic scenes") that could be learned and used for memory-  
 62 guided search. However, even though, to our knowledge, there is no empirical  
 63 evidence for enhanced memory-guided attentional selection in team sport athletes,  
 64 this is nevertheless an interesting question. It may well be that these athletes have

65 superior capabilities to learn scenes and use scene memory for attentional  
 66 guidance when the same or similar scenes are repeatedly encountered. Handball  
 67 players, for example, need to move in a particular direction or pass the ball to a  
 68 specific team member in a fraction of a second to be successful players.  
 69 Furthermore, specific situations are repeatedly encountered during a game and  
 70 may facilitate selection of the appropriate action. Thus, it could be that elite team  
 71 sport athletes have extraordinary skills in learning spatial contexts and using  
 72 context-knowledge for efficient attentional guidance in scenes that have been  
 73 encountered before. If these skills - due to training or as a selection phenomenon  
 74 (Kristjansson, 2013) - transfer to non-sport-specific situations, they would lead to  
 75 benefits outside of sport and should be observed even in abstract (semantically  
 76 meaningless) search tasks. This is what we investigated here in a group of high-  
 77 level amateur handball players. We compared their performance to that of non-  
 78 athletes on the one hand and to action video game players on the other hand.  
 79 Action video game players were selected because enhanced attentional skills  
 80 have been reported in this group, including improved visual control, greater  
 81 attentional capacity, and better spatial allocation of attention (Green & Bavelier,  
 82 2003), enhanced target detection (Feng, Spence, & Pratt, 2007; Green & Bavelier,  
 83 2006a), and faster response selection (Castel, Pratt, & Drummond, 2005; Clark,  
 84 Lanphear, & Riddick, 1987). For example, visual search was improved for action  
 85 video game players relative to non-gamers (Bavelier, Green, Han, Renshaw,  
 86 Merzenich, & Gentile, 2011; Buckley, Codina, Bhardwaj, & Pascalis, 2010;  
 87 Chisholm, Hickey, Theeuwes, & Kingstone, 2010; Chisholm & Kingstone, 2012;  
 88 Green & Bavelier, 2007; Hubert-Wallander, Green, Sugarman, & Bavelier, 2011).

89 However, conclusions regarding superior attentional skills in video gamers have  
 90 also met scepticism. Some issues have been different motivational levels of expert  
 91 and control groups, differential training histories and the typical gender imbalance  
 92 of video game studies are discussed by Kristjánsson (2013). Moreover, due to  
 93 sometimes inadequate control conditions claims of video game advantages should  
 94 be taken as tentative (Boot et al., 2011).

95 Like playing of a team sport, action video game playing leads to complex  
 96 sensory stimulation. In laboratory settings, action video game players showed  
 97 faster visual search in symbolic, not game-related displays (Castel et al., 2005;  
 98 Hubert-Wallander, Green, Sugarman, & Bavelier 2011; Wu, & Spence, 2013). An  
 99 obvious difference is the complexity of visuo-motor demands that is much higher  
 100 for handball players and may additionally support learning (Kramer, & Erickson,  
 101 2007).

102 A causal relationship between action video game experience and enhanced visual  
 103 and cognitive performance (Green & Bavelier, 2003; Li, Polat, Makous, & Bavelier,  
 104 2009) and enhanced attentional processes and resource management has been  
 105 postulated (Green & Bavelier, 2012). This, however, is still debated. Issues like  
 106 gender imbalance, different motivational levels, differential training histories of  
 107 testing groups, lack of comparable groups of video game studies and inadequate  
 108 control conditions have been criticized (Boot et al., 2011, 2013; Kristjánsson,  
 109 2013).

110 To investigate the contribution of scene learning to attentional processing in these  
 111 groups, we used the contextual cueing task (Chun, & Jiang, 1998). In this visual  
 112 search paradigm, a target element has to be searched in a distractor-filled display.

113 A typical block of trials consisted of one half of displays that were repeatedly  
 114 presented in subsequent blocks, while the other half of displays was always  
 115 randomly generated. In numerous studies with this paradigm, it has been found  
 116 that search becomes more efficient in repeated displays, even though participants  
 117 are often unaware of these repetitions (Chun, 2000). This search time advantage  
 118 for repeated versus novel displays indicates memory guided search. In addition to  
 119 this specific scene learning effect, unspecific task learning effects can be  
 120 assessed by the learning curves across novel and repeated displays. The nature  
 121 of these learning effects can be broken down even further by assessing the slope  
 122 and intercept of the search time function (response time as a function of the  
 123 number of display elements; Kunar, Flusberg, Horowitz, & Wolfe, 2007). This  
 124 analysis is based on a two-stage model of attentional processes, that are active  
 125 during search and postselective processes that follow target selection. The slope  
 126 indicates the increase of search times with increasing elements in the search  
 127 display. It can be quantified as search time per item and thus gives an estimate of  
 128 attentional processing speed. This should not be taken literally, shallower search  
 129 slopes can reflect faster sequential search or more parallel search. For instance,  
 130 the ability to process more items during a fixation (a larger attentional focus) would  
 131 lead to shallower slopes. In the case of serial and parallel search alike, however,  
 132 the search slope reflects the efficiency of the search. In contrast, the intercept of  
 133 the search time function with the y-axis indicates the residual time needed for  
 134 postselective processes that are independent of the number of display elements,  
 135 in particular processes for preparing and executing the response.

136 In the contextual cueing experiment, participants had to search for a T-shape  
 137 among arbitrary configurations of L-shaped distractors (Figure 1). Unbeknownst to  
 138 the participants, one half of the configurations was repeatedly presented, so that  
 139 search could be guided to the target location by incidentally learned  
 140 configurations. Incidental learning was characterized by faster search in repeated  
 141 configurations than novel configurations. Previous eye tracking studies have  
 142 shown that search in repeated displays is characterized by a monotonic approach  
 143 phase that typically begins after a few exploratory fixations. In this approach  
 144 phase, each new fixation is nearer to the target than the previous one (Manginelli,  
 145 and Pollmann, 2009; Tseng, and Li, 2004). This pattern suggests an ongoing  
 146 process of matching aspects of the search display with the memory trace of  
 147 previous displays held in working memory. Indeed, the search facilitation of  
 148 repeated displays is dependent on visuospatial working memory, as demonstrated  
 149 by the loss of the search facilitation when working memory is loaded by a  
 150 secondary task (Manginelli, Geringswald, and Pollmann, 2012; Manginelli, Langer,  
 151 Klose, and Pollmann, 2013).

152 If athletes or action video game players had an improved capacity for learning  
 153 visuospatial configurations and using them for memory-guided search, we  
 154 expected an increased search facilitation (reduction of search times) in these  
 155 groups relative to the control group in repeated compared to novel displays. Note  
 156 that we tested these abilities in a setting that is not sport-specific, in order to see if  
 157 athletes show generalized improvements of contextual cueing. If, alternatively,  
 158 team sport athletes or action video game players have superior attentional  
 159 capabilities independent of memory, they would be faster than controls in

160 searching novel and repeated displays alike and, additionally, search slopes  
161 should be shallower than in normal controls. A third potential hypothesis would be  
162 improved response (including response preparatory) processes in team sport  
163 athletes and action video game players. This would lead to reduced intercept  
164 values of the search time function.

165

## 166 **Methods**

### 167 **Participants**

168 A total of 75 participants (control: n=25 (10 men, 15 women), mean age = 24.4  
169 years, SD = 3.4; handball players: n=25 (15 men, 10 women), mean age = 21.5  
170 years, SD = 7.1; action video game players: n=25 (20 men, 5 women); mean age  
171 = 25.2 years, SD = 7.1) were recruited from the University of Magdeburg and the  
172 Olympic Training Center Saxony-Anhalt / Sportclub Magdeburg. All subjects were  
173 students or had already completed an academic education. The handball players  
174 consisted of fifteen adult players (5 men, 10 women) from a 3rd league handball  
175 team and 10 junior players (10 men) playing in the A and B national youth league.  
176 None of the handball players was a regular video game player, as assessed by  
177 interview. Video game players and controls were recruited from the University of  
178 Magdeburg. Action video game players had to fulfill the following criteria: action  
179 video game players needed to play action video games (e.g. Call of Duty;  
180 Activision, Infinity Ward) for a minimum of five hours a week for at least one year.  
181 Participants without any team sport and little to no action video game experience  
182 (less than 1 hour per week) were classified as controls. Twenty-one participants  
183 already participated in previous contextual cueing experiments, however with



184 different repeated displays (12 handball players, 9 video game players). All  
185 participants had normal or corrected-to-normal vision.

186 Informed written consent was acquired prior to the experiments. Subjects were  
187 remunerated with course credits or received a modest payment. Further, subjects  
188 were naive about the purpose of the experiment. The experiment was carried out  
189 in accordance with the declaration of Helsinki and was approved by the Ethics  
190 Committee of the University of Magdeburg.

191

## 192 Apparatus & Stimuli

193 The experiment was run using the OpenGL-Psychophysics Toolbox extensions  
194 (Brainard, 1997; Pelli, 1997) in MATLAB (The MathWorks, Sherborn, MA). Stimuli  
195 were displayed by a projector on a back-projection screen (1170 mm (1024 pixels)  
196 wide and 850 mm (768 pixels); vertical refresh rate of 60 Hz). Participants viewed  
197 the stimuli from a distance of 126 cm (pixel size of  $0.048^\circ \times 0.046^\circ$ ). Subjects  
198 completed the experiment individually in a dimly lit, sound-attenuated chamber.

199 Search displays contained one target ( $90^\circ$  or  $270^\circ$  rotated T) and 7 or 11  
200 distractors ( $0^\circ$ ,  $90^\circ$ ,  $180^\circ$ ,  $270^\circ$  rotated L) with each item subtending  $1.9^\circ \times 1.9^\circ$ .  
201 An offset of  $0.14^\circ$  between the two segments of the L-shapes was chosen to  
202 increase search difficulty. The orientation of the target and the orientation of  
203 distractors were randomly chosen for each trial. A black cross ( $2.4^\circ \times 2.4^\circ$ ) at the  
204 center of the display was used as a fixation stimulus. Stimuli were black displayed  
205 on a gray background. The items were randomly positioned on four imaginary  
206 concentric circles with radii of  $4^\circ$ ,  $8^\circ$ ,  $12^\circ$ , and,  $16^\circ$  each corresponding to 4, 12, 20,

207 and 28 equidistant possible item locations. The visual angle of the search display  
 208 on the projection screen extended an area of  $49.8^\circ \times 37.3^\circ$ .

209 Each trial started with a blank interval of 500 ms followed by the fixation cross for  
 210 1000 ms. After a brief pause of 200 ms, the search display appeared on the  
 211 projection screen (Figure 1). Participants were asked to search for the target letter  
 212 T among L-shaped distractors and further to specify as quickly and accurately as  
 213 possible whether the stem of the T was pointing to the left or right by mouse button  
 214 presses. They were further instructed not to apply active search strategies,  
 215 because these strategies diminish contextual cueing (Lleras, & von Mühlenen,  
 216 2004). The search display remained on the screen until a response was made by  
 217 the participants. Auditory feedback was provided for correct (a 500-Hz low-pitch  
 218 tone) and incorrect answers (a 1500-Hz high-pitch tone). Blocks comprised 24  
 219 trials, 12 for each configuration type (repeated vs. novel). The positions of the  
 220 items were balanced across quadrants and configuration type. Half of the trials  
 221 had a set size of 8 items, whereas the other half of trials comprise 12 items,  
 222 presented in randomized order (Figure 2).

223 The experiment started with 24 randomly generated displays (which were not  
 224 analyzed) to familiarize the participants with the task. Immediately afterwards 20  
 225 blocks of 24 trials were presented. Novel and repeated displays were created in  
 226 the exact same way. The only difference was that in blocks 2-20, 12 of the  
 227 displays of block 1 were repeated, while the remaining 12 were newly created for  
 228 each block. The entire experiment lasted approximately 45 min. At the end of the  
 229 search task, the participants performed a recognition test, to evaluate whether  
 230 repeated displays were explicitly remembered. The recognition test consisted of

231 24 trials, including the original 12 repeated and 12 randomly generated  
232 configurations, presented in randomized order. Participants had to indicate by  
233 keyboard button press whether they had seen the displays during the course of  
234 the experiment or not. No feedback was given in the recognition task.

235

## 236 Analysis

237 All statistical analyses were carried out using R-statistics (R Development Core  
238 Team, 2007). Experimental blocks were aggregated to four epochs, each  
239 containing five blocks. As one block contains only 12 novel and 12 repeated  
240 displays, we analyzed epochs in order to increase statistical power. Analyses of  
241 variance (ANOVAs) were performed using Type III sums of squares. For all  
242 statistical tests, the alpha level was set to 0.05.

243 Two data exclusion criteria were applied to the search time data. First, all incorrect  
244 responses were removed from the search time analyses because participants may  
245 not have completed search until the target was found. Second, trials in which the  
246 search time was shorter than 200 ms or larger than 3.5 standard deviations from  
247 the participants' average search time in the remaining trials were discarded in  
248 order to remove outliers (fast guesses and extremely long searches that may  
249 unduly bias the results). This led to the rejection of 4.4% (SD = 2.7%) of invalid  
250 data for the control group, 5.0% (SD = 3.9%) for handball players, and 5.6% (SD =  
251 4.2%) for action video game players.

252

## 253 Results

### 254 Search Times

255 A repeated measures ANOVA with configuration (repeated, novel), epoch (1, 4),  
256 and set size (8, 12) as within-subjects factors and group (control, handball players,  
257 action video game players) as between subjects factor was performed on search  
258 times (Figure 3).

259

260 We observed a significant main effect of group [ $F(2,72) = 7.331, p < 0.05$ ]. Post-  
261 hoc t-tests indicated that overall search speed was comparable between handball  
262 players (1808 ms) and action video game players (1773 ms;  $t(47) = 0.909, p =$   
263  $0.37$ ). However, both groups outperformed controls (1998 ms; handball players vs.  
264 control:  $t(48) = 2.890, p < 0.05$ ; action video game players vs. control:  $t(48) =$   
265  $3.566, p < 0.05$ ). The significant main effect of epoch [ $F(1,72) = 97.494, p < 0.05$ ]  
266 indicated general learning from the first (2100 ms) to the last epoch (1696 ms).  
267 Moreover, significant main effects of configuration [ $F(1,72) = 29.047, p < 0.05$ ] and  
268 set size [ $F(1,72) = 350.173, p < 0.05$ ] were found. Search times were shorter for  
269 repeated displays (1811 ms) than for novel displays (1892 ms) and for set size 8  
270 (1557 ms) in comparison to set size 12 (2149 ms). The significant interaction of  
271 epoch x configuration [ $F(1,72) = 25.287, p < 0.05$ ] revealed contextual cueing.

272 Search times decreased by 318 ms in novel displays from the first to the last  
273 epoch and by 488 ms in repeated displays. Moreover, we observed significant  
274 interactions between group x epoch [ $F(2,72) = 3.264, p < 0.05$ ] and group x set  
275 size [ $F(2,72) = 5.631, p < 0.05$ ]. Handball and action video game players,  
276 beginning with shorter search times in Epoch 1, showed less search time  
277 reduction over epochs than controls. Larger set size slowed search much more in

278 controls than in the other two groups. No other main effects or interactions were  
279 significant [all  $F \leq 3.16$ ,  $p > 0.05$ ].

280 The non-significant result for the critical group x configuration x epoch interaction -  
281 indicative of contextual cueing differences across groups – could be due to either  
282 equivalence of contextual cueing scores or lack of statistical power (Dienes, 2014).

283 To investigate this alternative further, we calculated a Bayesian repeated  
284 measures ANOVA in JASP (JASP Team, 2018, Version 0.8.2) on the group x  
285 epoch interaction of the contextual cueing effect ((RT in novel displays - RT in  
286 repeated displays) / RT in novel displays) and obtained a  $BF_{01} = 12.03$ , i.e. strong  
287 support for equivalence of contextual cueing scores across groups and epochs.

288 Likewise, the group x epoch x set size interaction of contextual cueing scores  
289 yielded a  $BF_{01} = 7.28$ , i.e. moderate support for equivalence of contextual cueing  
290 scores.

291 Some of the handball players and video game players had taken part in similar  
292 experiments before (see methods). To rule out that prior experience influenced the  
293 results, in particular the group main effect, we ran an additional ANOVA,  
294 analogous to the one reported above, in which these participants were excluded  
295 (12 handball players, 9 video game players). Due to the reduced sample size,  
296 handball players and video game players were combined into one group. The  
297 ANOVA yielded a comparable pattern of results as in the main analysis, in  
298 particular a significant group main effect [ $F(1,53) = 5.622$ ,  $p < 0.05$ ]. The only  
299 differences were a non-significant group x epoch interaction [ $F(1,53) = 1.859$ ,  $p >$   
300  $0.05$ ] and a significant four-way interaction [ $F(1,53) = 8.274$ ,  $p < 0.05$ ], reflecting  
301 the strong search time reduction over time for repeated displays of large set size in

the control group (Figure 3), as confirmed by separate ANOVAs on search times for the control group and the experimental groups (handball and video game players) with configuration (repeated, novel), epoch (1, 4), and set size (8, 12) as within-subjects factors. In addition to significant main effects of epoch [control group:  $F(3,72) = 29.251, p < 0.05$ ; experimental group:  $F(3,87) = 22.788, p < 0.05$ ], configuration [control group:  $F(1,24) = 19.889, p < 0.05$ ; experimental group:  $F(1,29) = 22.288, p < 0.05$ ] and set size [control group:  $F(1,24) = 204.587, p < 0.05$ ; experimental group:  $F(1,29) = 154.997, p < 0.05$ ], in the control group, significant interactions of epoch x configuration [ $F(3,72) = 2.978, p < 0.05$ ] and epoch x condition x set size [ $F(3,72) = 2.771, p < 0.05$ ] were found that were absent in the experimental group [all interactions  $F \leq 2.60, p > 0.05$ ].

Independent samples t-tests (Welch t-test) on mean age between groups reveal significant differences on mean age for control group vs. handball players [ $t(41) = 3.143, p = 0.003$ ] and for action video game players vs. handball players [ $t(30) = -2.259, p = 0.031$ ]. T-test on mean age between control group and action video game players were not significant [ $t(33) = 1.744, p = 0.09$ ]. The age differences between the handball players and the other groups were due to the group of junior handball players (see participants section). To test for potential age effects on mean reaction times, we calculated an ANOVA with the within-subject factors configuration (repeated, novel) and epoch (1, 4) and the between-subject factor group (junior handball players, adult handball players). While significant main effects of epoch [ $F(1,23) = 16.553, p < 0.05$ ], configuration [ $F(1,23) = 13.704, p < 0.05$ ], set size [ $F(1,23) = 95.177, p < 0.05$ ] and a significant interaction of epoch x configuration [ $F(1,23) = 4.293, p < 0.05$ ] replicated our analyses above,

326 importantly, no significant main effect of group or interaction effects involving the  
327 group factor were observed [all  $F \leq 3.11$ ,  $p > 0.05$ ]. Thus, we have no evidence  
328 for an age effect.

329 It might be argued that the lower search times that we observed in Epoch 1 for the  
330 athletes and video game players relative to the control group were potentially due  
331 to fast learning in Epoch 1 in the former two groups. To analyze this hypothesis,  
332 we ran an additional ANOVA on the Epoch 1 search times with configuration  
333 (repeated, novel), block (1 - 5), and set size (8, 12) as within-subjects factors and  
334 group (control, handball players, action video game players) as between subjects  
335 factor. We observed significant main effects of group [ $F(2,72) = 7.474$ ,  $p < 0.05$ ],  
336 block [ $F(4,288) = 7.870$ ,  $p < 0.05$ ], set size [ $F(1,72) = 299.923$ ,  $p < 0.05$ ], and a  
337 significant group x set size interaction [ $F(2,72) = 7.891$ ,  $p < 0.05$ ]. The group x  
338 condition x set size interaction narrowly missed significance [ $F(1,72) = 3.077$ ,  $p =$   
339  $0.052$ ]. All other effects were not significant [all  $F \leq 1.490$ , all  $p > 0.16$ ]. Thus,  
340 importantly, we observed no significant interactions involving group x block that  
341 might indicate different learning rates of the groups in Epoch 1.

342 We further investigated potential effects of sex on search time with an ANOVA  
343 with sex as between-subject factor and configuration, epoch and set size as  
344 within-subject factors. This analysis yielded no significant main effect of sex  
345 [ $F(1,73) = 0.138$ ,  $p = 0.71$ ] and no significant interactions involving sex [all  $F \leq$   
346  $2.44$ ,  $p > 0.12$ ].

347

348 For further analysis of the contribution of attentional and post-selective processes  
349 contained in the search times, we investigated the slopes and intercepts of the

350 search time x set size function (Figures 4 and 5). A repeated measures analysis of  
351 variance (ANOVA) with configuration (repeated, novel), and epoch (1, 4) as within-  
352 subject factors and group (control, handball, video) as between subjects factor  
353 was performed separately on slope and intercept data.

354 *Slopes:* As an indicator for search efficiency, we calculated the slopes of the  
355 search time x set size regression lines. We observed a main effect of group  
356 [ $F(2,72) = 6.502, p < 0.05$ ] on slopes. No other main effects or interactions were  
357 significant (Table 1). Post-hoc t-tests revealed that mean search times per item  
358 were higher for controls (135 ms / display item) than for handball players (96 ms,  
359  $t(47) = 2.661, p < 0.05$ ) or action video game players (93 ms;  $t(47) = 2.990, p <$   
360  $0.05$ ), but did not differ between handball and action video game players [ $t(48) =$   
361  $0.317, p = 0.75$ ].

362 Again, we repeated the analysis excluding participants with prior experience in  
363 contextual cueing experiments. This ANOVA confirmed the significant group main  
364 effect [ $F(1,53) = 4.531, p < 0.05$ ]. The only other significance was observed for the  
365 three-way interaction [ $F(1,53) = 8.274, p < 0.05$ ], reflecting the large decrease of  
366 the search slope over time for repeated displays in the control group.

367

368 *Intercepts:* An analogous repeated measures ANOVA as for slopes was calculated  
369 on the intercepts. The intercept analysis revealed a significant main effect of  
370 epoch [ $F(1,72) = 9.207, p < 0.05$ ], indicating a reduction of intercepts over the  
371 course of learning. No other main effects or interactions were significant (Table 1).  
372 An ANOVA excluding participants with prior experience in contextual cueing  
373 confirmed the significant main effect of epoch [ $F(1,53) = 5.019, p < 0.05$ ]. The



374 only other significant effect was observed for the three-way interaction, reflecting  
375 the increase of the intercept from Epoch 1 - 4 for repeated displays in the control  
376 group.

377 All statistical results of the between-group analyses of contextual cueing for slope  
378 and intercept data are reported in Table 1.

379

### 380 Accuracy

381 We observed very high average accuracies for all groups (98.1% for the control  
382 group, 97.1% for the handball players and 97.1% for the action video game  
383 players; Table 2). An ANOVA on the logit-transformed accuracy data with the  
384 between-subjects factor group (control, handball, video) and the within-subject  
385 factor configuration (repeated vs. novel) yielded no significant effects [all  $F \leq$   
386 2.226,  $p > 0.05$ ]. To test for equivalence, we calculated an analogous Bayesian  
387 ANOVA on the logit-transformed accuracies. It yielded a  $BF_{01} = 3.71$ , i.e. moderate  
388 support for equivalence of accuracies between groups (main effect). The group x  
389 configuration interaction yielded a  $BF_{01} = 6.37$ , i.e. moderate support for  
390 equivalence of group effects across configurations.

391 Again, we repeated the analysis excluding participants with prior experience in  
392 contextual cueing experiments. High accuracies (96.5%) for the participants  
393 without experience were observed. The ANOVA on accuracy for the subgroup  
394 without prior experience confirmed the non-significant effects obtained for the  
395 whole group [all  $F \leq 2.455$ ,  $p > 0.05$ ].

396

### 397 Recognition Task

398 The control group obtained a mean recognition accuracy of 58.7% (SD = 10.3%).  
 399 The mean hit rate of 58.7% (SD = 17.6%) and the mean false alarm rate of 41.3%  
 400 (SD = 13.5%) differed significantly [ $t(24) = 4.1903$ ,  $p < 0.05$ ]. However, the  
 401 correlation between the standardized contextual cueing effect and the recognition  
 402 accuracy was not significant ( $r = 0.095$ ,  $p > 0.05$ ).  
 403 Mean recognition accuracy for the handball players was 56.8% (SD = 13.2%).  
 404 Their mean hit rate of 56.7% (SD = 10.8%) and the mean false alarm rate of  
 405 43.0% (SD = 21.3%) differed significantly [ $t(24) = 2.594$ ,  $p < 0.05$ ]. The normalized  
 406 contextual cueing effect, again, did not correlate with recognition accuracy ( $r = -$   
 407  $0.047$ ,  $p > 0.05$ ).  
 408 Action video game players reached a mean recognition accuracy of 52.2% (SD =  
 409 11.6%). Hits ( $M = 49.0\%$ ,  $SD = 18.7\%$ ) and false alarms ( $M = 44.7\%$  ( $SD = 11.8\%$ )  
 410 were not significantly different [ $t(24) = 0.933$ ,  $p > 0.05$ ], yielding no indication of  
 411 explicit learning. Again, recognition accuracy did not correlate with the normalized  
 412 contextual cueing effect ( $r = -0.615$ ,  $p > 0.05$ ).

413

## 414 **Discussion**

415 We investigated if high-level amateur team sport players and action video game  
 416 players show a superior visual search performance in arbitrary, non-sport specific  
 417 search configurations. In particular, we investigated if visual search performance in  
 418 these groups benefits from superior search guidance and/or context learning  
 419 abilities.  
 420 Participants searched for a T-shape among L-shaped distractors and had to  
 421 indicate the orientation of the T-shape by an alternative forced choice button

422 press. Half of the search configurations were repeated across blocks so that the  
 423 configurations could be learned and used to guide search for the target location.  
 424 Importantly, the orientation of the target was always random so that no specific  
 425 response could be associated with any repeated display.

426 We found that both handball players and action video game players searched  
 427 faster than controls. This search time advantage was analyzed further in that we  
 428 calculated search slopes, i.e. search time increase per display item, as a measure  
 429 of search efficiency. Search times per display item were shallower in both handball  
 430 players and action video game players, indicating that the members of both groups  
 431 needed less time to analyze the contents of a search display than controls. This is  
 432 in agreement with previous work that reported shorter search times per item in  
 433 action video game players than controls in inefficient search tasks such as the one  
 434 used here (Hubert-Wallander et al, 2011; Wu, & Spence, 2013). While slopes are  
 435 defined by search duration per item, this should not be taken literally. Shallower  
 436 slopes could mean faster sequential processing of the search display, but it could  
 437 also mean faster parallel processing of the display, for instance using a larger  
 438 attentional focus. We cannot distinguish between this alternative on the basis of  
 439 the current data. However, this question could be addressed in future work using  
 440 eye-tracking or reaction time modeling (e.g. Müller-Plath, & Pollmann, 2003). We  
 441 also note that our interpretation depends on the assumption of two - selective and  
 442 postselective - processing stages but other models are of course possible and  
 443 may lead to different interpretations (Kristjansson, 2015),

444 In contrast, no difference between groups was observed regarding the intercepts  
 445 of the search time regression curve with the y-axis. The intercept indicates fixed

446 time "costs" that are independent of display size and may arise due to response  
 447 preparation or execution. In the context of visual search, slopes and intercepts are  
 448 usually interpreted as indicators of attentive respectively post-selective processes  
 449 (e.g. Kunar et al., 2007, but see criticism by Kristjansson, 2015). In this framework,  
 450 the superior search performance of both athletes and video game players could be  
 451 attributed to superior attentive processing. This pattern was confirmed when  
 452 athletes with prior experimental experience were excluded from the analysis.

453 In addition, the comparison of novel and repeated display configurations enabled  
 454 us to investigate spatial configuration learning. Although context learning was  
 455 incidental, i.e. participants did not know about display repetition, search times  
 456 decreased more in repeated than novel displays over the course of the  
 457 experiment. Thus, all groups showed incidental learning of repeated displays, in  
 458 line with many previous reports on this contextual cueing effect (Chun, 2000).  
 459 However, handball players and action video game players did not differ from  
 460 controls (nor from each other) in the amount of search facilitation in repeated  
 461 configurations. Thus, our data yield no evidence for superior learning of arbitrary  
 462 scenes.

463 We could rule out effects of age and prior experience with psychological  
 464 experiments as factors of influence. As in previous studies, we had a sex  
 465 imbalance between groups, mainly due to the male dominance among the action  
 466 video game players. Sex, however, did not significantly influence search times.

467 Handball players and controls selected repeatedly presented displays with above-  
 468 chance probability, indicating at least partial explicit memory. However, recognition  
 469 accuracy did not correlate with the size of the contextual cueing effect (the search

470 time reduction in repeated displays). Thus, we have no indication that contextual  
471 cueing was due to top-down controlled search based on explicit knowledge of the  
472 target location in repeated displays.

473 It should be noted that the improved search performance of the handball and  
474 action video game players was present from the beginning of the experiment and  
475 did not develop further over the course of the experiment. In fact, the control group  
476 showed a stronger search time reduction than the two experimental groups. Thus,  
477 the handball and action video game players already started with superior  
478 attentional capabilities and did not develop them with repeated stimulus exposure,  
479 in contrast to what has been reported in very demanding psychophysical tasks  
480 (Bejjanki et al., 2014).

481 Several caveats should be considered regarding superior performance of athletes  
482 or video-game players. In the present study, we needed to rely on open recruiting  
483 of semi-professional handball players, because they would not occur frequently  
484 enough in a random sample. Selection of special groups, however, may go along  
485 with the motivation to perform well (Boot et al., 2011), particularly because reports  
486 of superior performance, particularly of video game players, have been published  
487 in the general media. However, the accuracy data yielded no indication of a  
488 speed-accuracy trade-off. Nevertheless, we cannot completely rule out that search  
489 speed was more affected by motivation than contextual cueing, perhaps because  
490 the former is an evident goal of a search task, whereas display repetition is not  
491 announced and often not consciously perceived, or only perceived late during the  
492 task.

493 Moreover, we do not know if the superior search performance of the handball  
 494 players and action video game players is a training or a selection effect.  
 495 Longitudinal studies would be needed to investigate if handball or action video  
 496 game training leads to improved search performance. Alternatively, it may be that  
 497 persons with superior attentional processing skills are more likely to become  
 498 successful handball or action video game players (Kristjansson, 2013).  
 499 Furthermore, our findings do not imply that handball players may not have better  
 500 memory-guided search in realistic handball scenes. In fact, across many studies,  
 501 sport-specific displays, stimuli, and processing requirements were more likely to  
 502 lead to expert-novice differences (Abernethy, 1987, 1988; Mann et al., 2007). Our  
 503 results, however, do not support the view that handball players or video game  
 504 players have better memory-guided search outside of their domains of expertise.  
 505 To conclude, we replicated previous reports of faster visual search in athletes and  
 506 in action video game players. In addition, we observed that the superior search  
 507 speed was due to faster attentional processing, whereas response-related  
 508 processes did not differ from the control group. In contrast, handball players or  
 509 action video game players showed no better-than-normal attentional guidance by  
 510 learned spatial contexts.

511

## 512 **Compliance with ethical standards**

513 All procedures performed in studies involving human participants were in  
 514 accordance with the ethical standards of the institutional and/or national research  
 515 committee and with the 1964 Helsinki declaration and its later amendments or

516 comparable ethical standards. Informed consent was obtained from all individual  
517 participants included in the study.

518

# 519 **References:**

- 520 Abernethy, B. (1987). Selective attention in fast ball sports: II: Expert-novice  
521 differences. *Australian Journal of Science and Medicine in Sport*, 19(4), 7-  
522 16.
- 523 Abernethy, B. (1988). Visual search in sport and ergonomics: Its relationship to  
524 selective attention and performer expertise. *Human Performance*, 1(4), 205-  
525 235.
- 526 Abernethy, B. (1991). Visual search strategies and decision-making in sport.  
527 *International Journal of Sport Psychology*, 22, 189-210.
- 528 Alvarez, G.A., Franconeri, S.L. (2007). How many objects can you track?  
529 Evidence for a resource-limited attentive tracking mechanism. *Journal of*  
530 *Vision*, 7(13), 14,1-10. doi:10.1167/7.13.14
- 531 Bavelier, D., Green, C. S., Han, D. H., Renshaw, P. F., Merzenich, M. M., &  
532 Gentile, D. A. (2011). Brains on video games. *Nature Reviews*  
533 *Neuroscience*, 12(12), 763-768.
- 534 Bejjanki, V.R., Zhang, R., Li, R., Green, C.S., Lu, Z.L. & Bavelier, D. (2014). Action  
535 video game play facilitates the development of better perceptual templates.  
536 *Proceedings of the National Academy of Sciences of the USA*, 111, 16961-  
537 16966, doi: 10.1073/pnas.1417056111
- 538 Boot, W. R., Blakely, D. P., & Simons, D. J. (2011). Do action video games  
539 improve perception and cognition?. *Frontiers in Psychology*, 2

540 Brainard, D. H. (1997). The psychophysics toolbox. *Spatial Vision*, 10, 433-436.

541 Castel, A.D., Pratt, J. & Drummond, E. (2005). The effect of action video game  
542 experience on the time course of inhibition of return and the efficiency of  
543 visual search. *Acta Psychologica* 119, 217-230.

544 Chun, M. M., & Jiang, Y. (1998). Contextual Cueing: Implicit learning and memory  
545 of visual context guides spatial attention. *Cognitive Psychology*, 36, 28-71.

546 Chun, M. M. (2000). Contextual cuing of visual attention. *Trends in Cognitive*  
547 *Sciences*, 4, 170-178.

548 Clark, J. E., Lanphear, A. K., & Riddick, C. C. The effects of videogame playing on  
549 the response selection processing of elderly adults. *Journal of Gerontology*,  
550 42(1), 82-85.

551 Faubert, J. (2013). Professional athletes have extraordinary skills for rapidly  
552 learning complex and neutral dynamic visual scenes. *Scientific Reports*, 3,  
553 1-3.

554 Feng, J., Spence, I., & Pratt, J. (2007). Playing an action video game reduces  
555 gender differences in spatial cognition. *Psychological Science*, 18(10), 850-  
556 855.

557 Green, C. S., & Bavelier, D. (2003). Action video game modifies visual selective  
558 attention. *Nature*, 423, 534-537.

559 Green, C. S., & Bavelier, D. (2006). Effect of action video games on the spatial  
560 distribution of visuospatial attention. *Journal of Experimental Psychology:*  
561 *Human Perception and Performance*, 32(6), 1465-1478.

562 Hubert-Wallander, B., Green, C.S., Sugarman, B & Bavelier, D. (2011). Changes  
563 in search rate but not in the dynamics of exogenous attention in action



564 videogame players. *Attention, Perception and Psychophysics*, 73, 2399-  
565 2412.

566 Kramer, A.F., & Erickson, K.I. (2007). Capitalizing on cortical plasticity: influence of  
567 physical activity on cognition and brain function. *Trends in Cognitive*  
568 *Sciences*, 11, 342-348.

569 Kristjansson, A. (2013). The case for causal influences of action videogame play  
570 upon vision and attention. *Attention, Perception, and Psychophysics*, 75,  
571 667-672.

572 Kristjansson, A. (2015). Reconsidering visual search. *i-Perception*, 6(6),  
573 <https://doi.org/10.1177/2041669515614670>.

574 Kunar, M. A., Flusberg, S., Horowitz, T. S. & Wolfe, J. M. (2007). Does contextual  
575 cueing guide the deployment of attention? *Journal of Experimental*  
576 *Psychology: Human Perception and Performance*, 33(4), 816-828.

577 Lleras, A. & Von Mühlenen, A. (2004). Spatial context and top-down strategies in  
578 visual search. *Spatial Vision*, 17(4-5), 465-482.

579 Manginelli, A. A., Geringswald, F. & Pollmann, S. (2012). Visual search facilitation  
580 in repeated displays depends on visuospatial working memory.  
581 *Experimental Psychology*, 59, 47-54.

582 Manginelli, A.A. & Pollmann, S. (2009) Misleading contextual cues - how do they  
583 affect visual search? *Psychological Research*, 73, 212-221.

584 Manginelli, A.A., Langer, N., Klose, D. & Pollmann, S. (2013). Contextual cueing  
585 under working memory load: Selective interference of visuospatial load with  
586 expression of learning. *Attention, Perception, & Psychophysics*, 75(6),  
587 1103-1117.

588 Mann, D.T.Y., Williams, A.M., Ward, P. & Janelle, C.M. (2007). Perceptual-  
589 cognitive expertise in sport: a meta-analysis. *Journal of Sport and Exercise*  
590 *Psychology*, 29, 457-478.

591 Merkel, C., Hopf, J.M. & Schoenfeld, M.A. (2017). Spatio-temporal dynamics of  
592 attentional selection stages during multiple object tracking. *Neuroimage*  
593 146, 484-491. doi: 10.1016/j.neuroimage.2016.10.046.

594 Pelli, D. G. (1997). The VideoToolbox software for visual psychophysics:  
595 Transforming numbers into movies. *Spatial Vision* 10(4), 437-442.

596 Pylyshyn, Z. W. & Storm, R. W. (1988). Tracking multiple independent targets:  
597 Evidence for a parallel tracking mechanism. *Spatial Vision*, 3(3), 179-197.

598 Timmis, M.A., Turner, K. & van Paridon, K.N. (2014). Visual search strategies of  
599 soccer players executing a power vs. placement penalty kick. *Plos One*,  
600 9(12), e115179. doi:10.1371/journal.pone.0115179

601 Tseng, Y.-C. & Li, C.-S. R.. M. (2004). Oculomotor correlates of context-guided  
602 learning in visual search. *Perception & Psychophysics* , 66(8), 1363-1378.

603 Wu, S. & Spence, I. (2013). Playing shooter and driving videogames improves top-  
604 down guidance in visual search. *Attention, Perception, and Psychophysics*,  
605 75, 673-686.

606

607 **Acknowledgements**

608 This work was supported by the Deutsche Forschungsgemeinschaft (PO548/14-1  
609 and SFB779-A4).

610

611 **Author contributions**

612 A.S. designed the study, wrote the experimental code, acquired and analyzed the  
613 data and wrote the manuscript. F.G. wrote the experimental code and analyzed  
614 the data. F.S analyzed the data. S.P. designed the study and wrote the  
615 manuscript.

616

617 **Additional information:**

618 The authors declare no competing financial interests.

619

620

621 **Tables:**

622 Table 1: Statistical results of the slope and intercept analyses.

|                       | Measure |             |          |            |             |          |
|-----------------------|---------|-------------|----------|------------|-------------|----------|
|                       | Slopes  |             |          | Intercepts |             |          |
| Effect                | F       | p           | $\eta^2$ | F          | P           | $\eta^2$ |
| Group                 | 6.50    | <b>.003</b> | .062     | 1.36       | 0.26        | .011     |
| Condition             | 0.04    | 0.85        | .000     | 1.39       | 0.24        | .005     |
| Epoch                 | 0.65    | 0.58        | .002     | 4.13       | <b>.007</b> | .012     |
| Group:Condition       | 1.75    | 0.18        | .013     | 1.60       | 0.21        | .013     |
| Group:Epoch           | 0.63    | 0.70        | .003     | 0.27       | 0.95        | .002     |
| Condition:Epoch       | 1.21    | 0.31        | .003     | 0.25       | 0.86        | .001     |
| Group:Condition:Epoch | 1.70    | 0.12        | .009     | 1.66       | 0.13        | .009     |

623

624 Table 2: Accuracy data by group and epoch.

| Group              | Epoch |       |       |       |
|--------------------|-------|-------|-------|-------|
|                    | 1     | 2     | 3     | 4     |
| Control group      | 0.976 | 0.979 | 0.983 | 0.984 |
| Handball players   | 0.960 | 0.970 | 0.976 | 0.976 |
| Video game players | 0.965 | 0.964 | 0.974 | 0.981 |

625

626

627

# Figures:

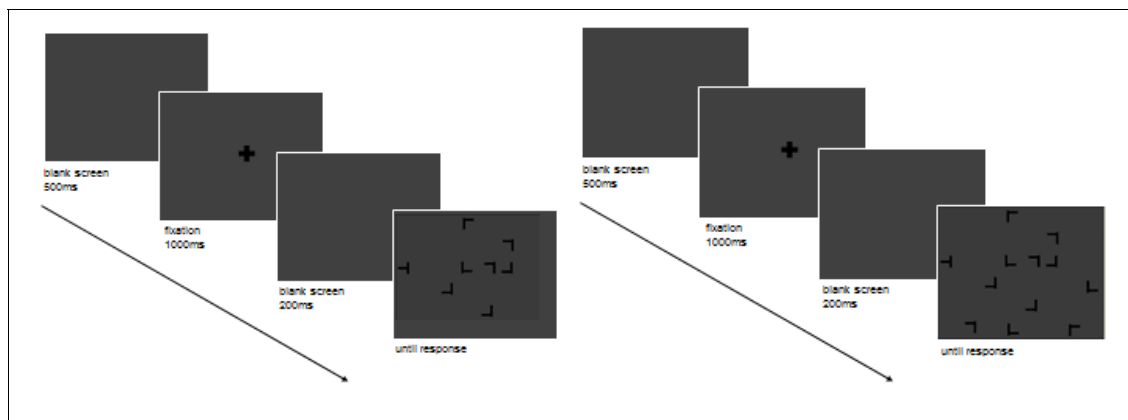

Figure 1: Schema of an experimental trial. Each trial consisted of a blank interval (500 ms) followed by the fixation cross (1000 ms) and a brief pause of 200 ms. Subsequently, participants were asked to search for a tilted target letter T among L-shaped distractors and the search display was presented until a response was made, followed by auditory feedback for the correctness of the response. Set size was varied between seven distractors (left) and eleven distractors (right) randomly within search blocks.

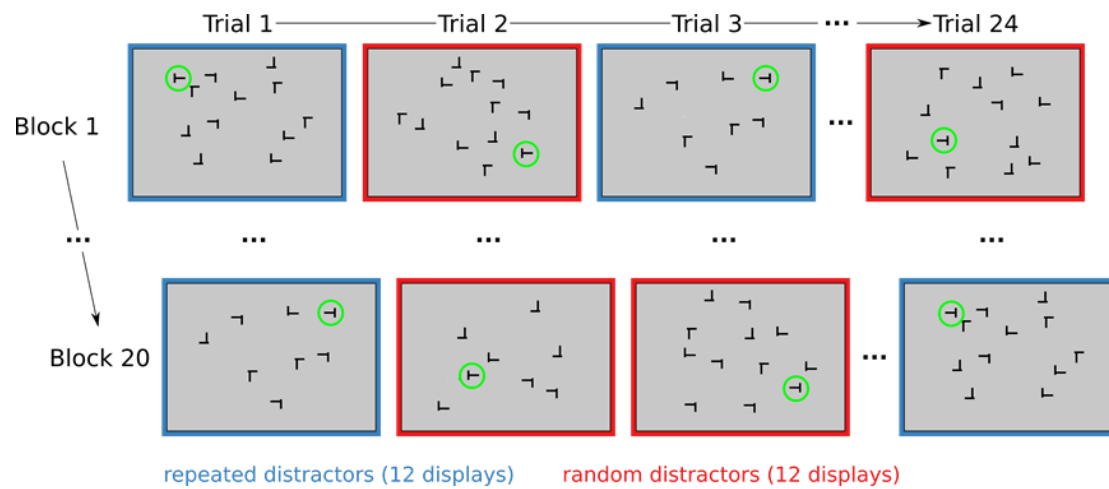

640  
641 Figure 2: Experimental procedure. 20 blocks of 24 trials were presented. Blocks  
642 comprised 24 trials, 12 for each configuration type (repeated vs. novel). The red  
643 (novel displays) and blue (repeated displays) frames and the green circles  
644 indicating the targets are added for clarity, they were not visible during the  
645 experiment. The positions of the items were balanced across quadrants and  
646 configuration type. Half of the trials had a set size of 8 items, whereas the other  
647 half of trials comprise 12 items, presented in randomized order.  
648

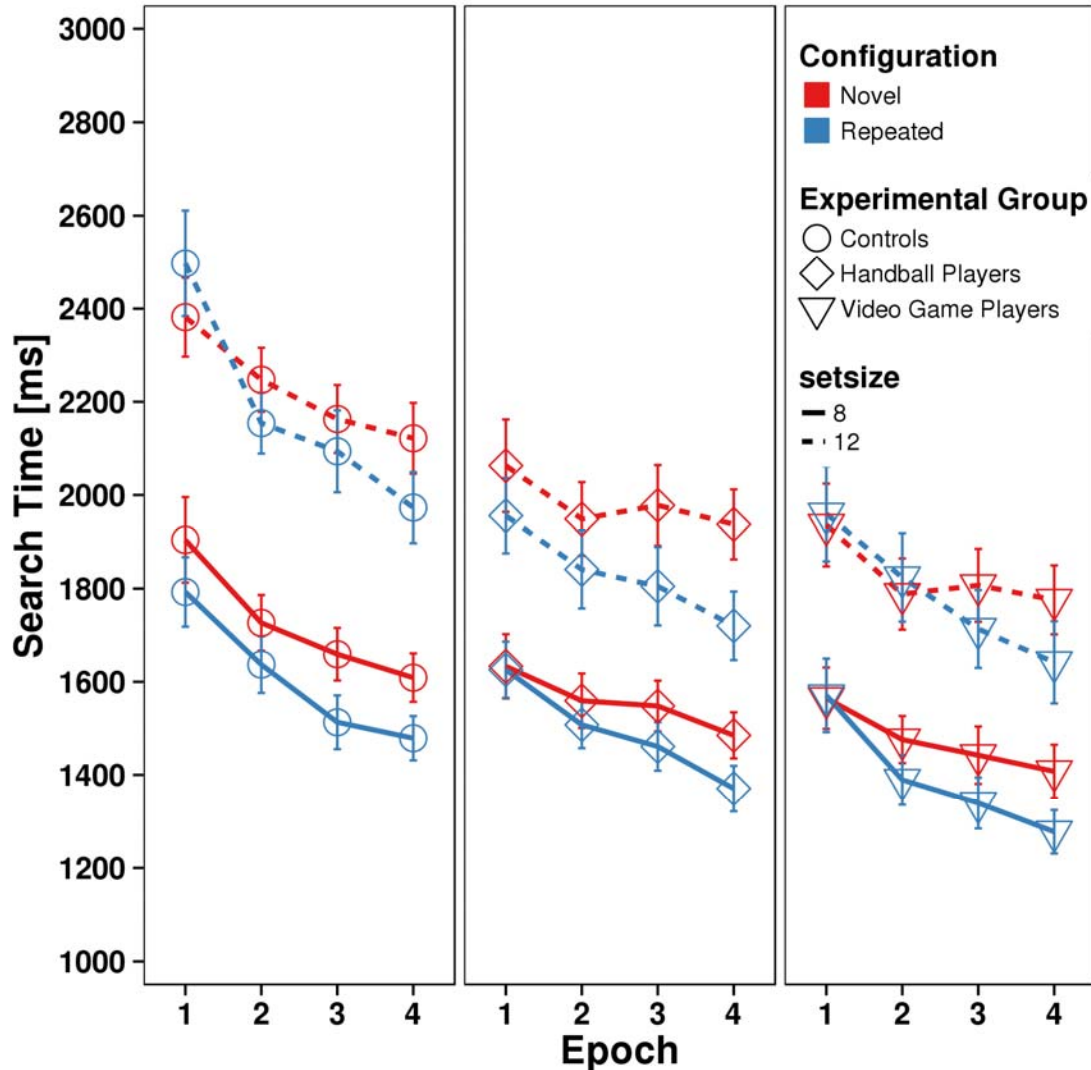

Figure 3: Mean search times in the visual search task. Error bars represent the standard error of means. Search times are plotted across epochs, each containing 5 search blocks, for controls (left), handball players (middle) and action video game players (right), separated for novel (red) and repeated (blue) search displays and set size eight (solid lines) and twelve (dashed lines).

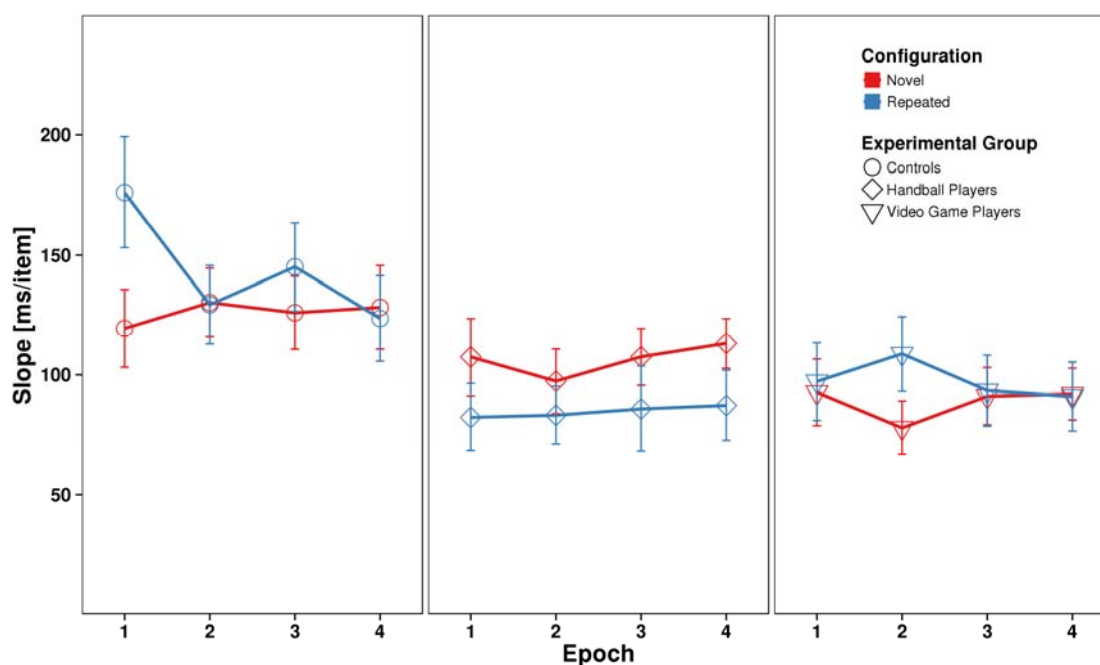

Figure 4: Mean search slopes of the regression line of search times. Error bars represent the standard error of means. Slopes are plotted across epochs, each containing 5 search blocks, for controls (left), handball players (middle) and action video game players (right), separated for novel (red) and repeated (blue) search displays.



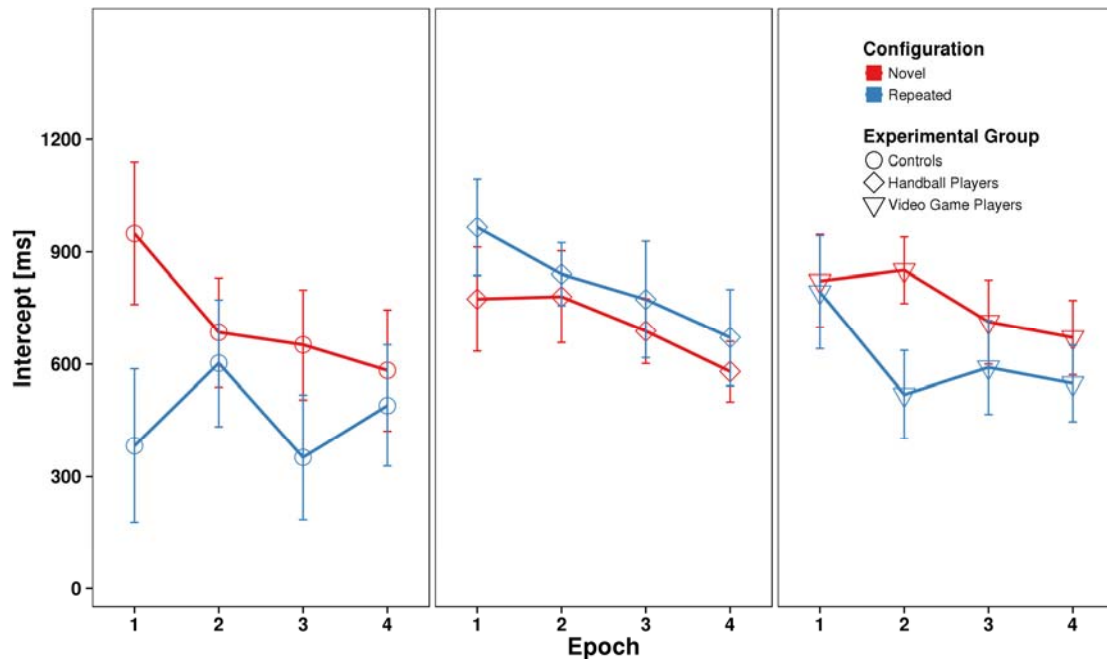

661

662 Figure 5: Mean intercepts of the regression line of search times. Error bars  
663 represent the standard error of means. Intercepts are plotted across epochs, each  
664 containing 5 search blocks, for controls (left), handball players (middle) and action  
665 video game players (right), separated for novel (red) and repeated (blue) search  
666 displays.
